# Supplementary material for: Land- to lake-terminating transition triggers dynamic thinning of a Bhutanese glacier
Source: Copernicus journal article supplement (doi:10.5194/tc-2021-286), 2021-10-20
Supplement: Supplementary file 1 [file tc-2021-286-supplement.pdf]

Supplementary material:

## Land- to lake-terminating transition triggers dynamic thinning of a Bhutanese glacier

Yota Sato<sup>1</sup>, Koji Fujita<sup>1</sup>, Hiroshi Inoue<sup>2</sup>, Akiko Sakai<sup>1</sup> and Karma<sup>3</sup>

<sup>1</sup> Graduate School of Environmental Studies, Nagoya University, Nagoya, Japan

<sup>2</sup> National Research Institute for Earth Science and Disaster Resilience (NIED), Tsukuba, Japan

<sup>3</sup> National Centre for Hydrology and Meteorology (NCHM), Thimphu, Bhutan

Correspondence to: Yota Sato (yota.sato@nagoya-u.jp)

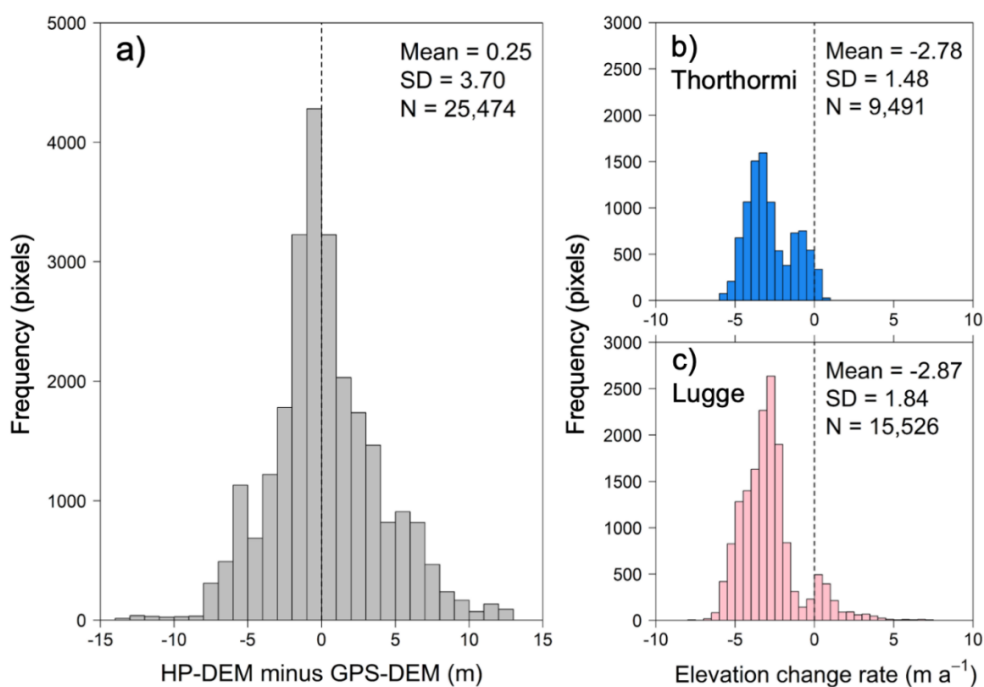

**Figure S1.** (a) Vertical accuracy of the helicopter-derived DEM (HP-DEM) on the off-glacier terrain. Surface elevation change rates for (b) Thorthormi and (c) Lugge glaciers during the 2011–2018 period. SD and N refer to the standard deviation and number of pixels, respectively.

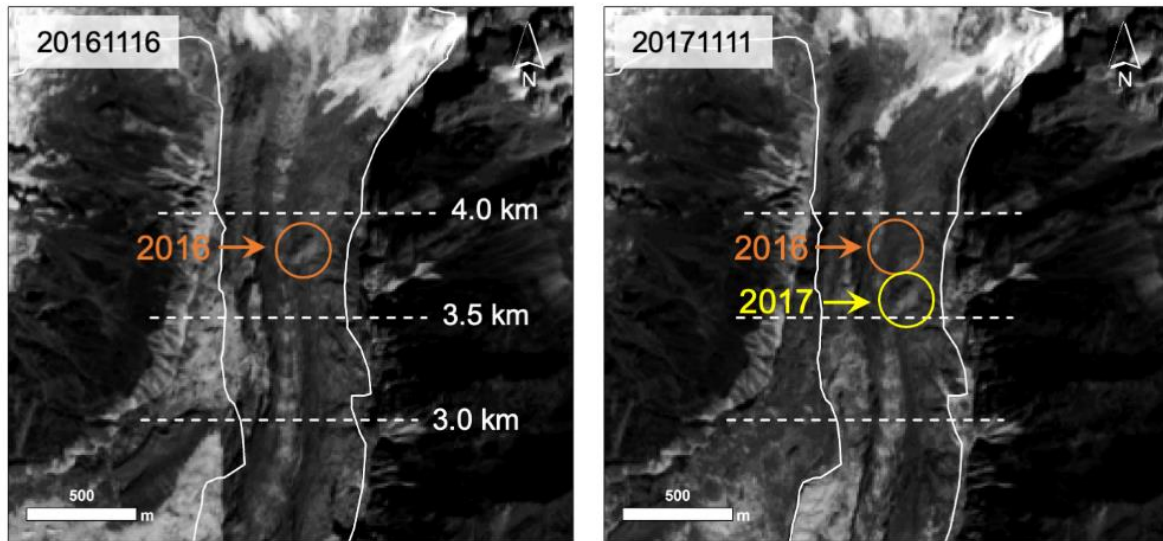

**Figure S2.** Sentinel-2 satellite images of Thorthormi Glacier that were acquired on 16 November 2016 (left) and 11 November 2017 (right). Both panels show the same glacier domain. Circles indicate displaced topographic features (debris mounds) on the glacier surface, and dashed lines indicate the distance from the 2002 terminus of Thorthormi Glacier.
